# Supplementary material for: The PRogram In Support of Moms (PRISM): study protocol for a cluster randomized controlled trial of two active interventions addressing perinatal depression in obstetric settings
Source: Springer Nature journal article supplement (doi:10.1186/s12884-019-2387-3), 2019-07-22
Supplement: MOESM1 [file 16970396]

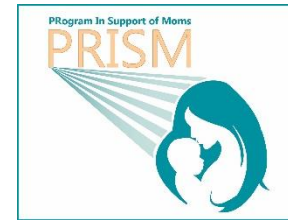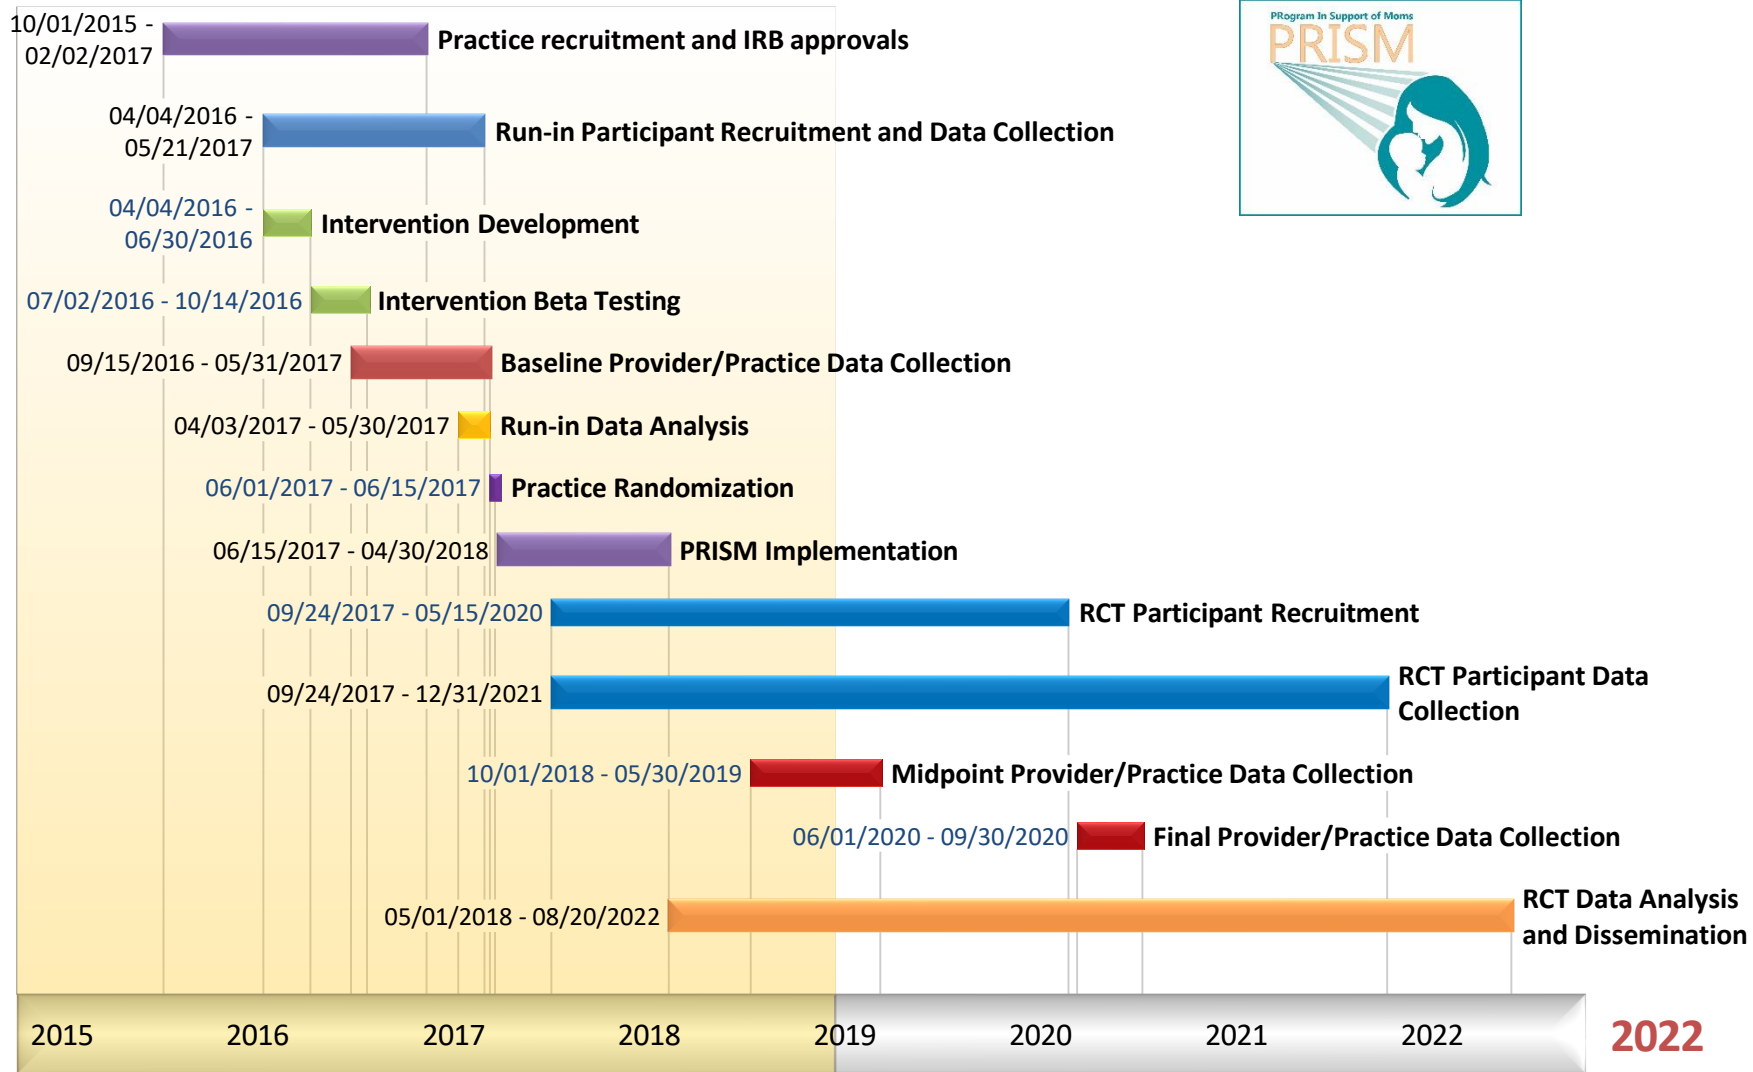

01/31/2021  
 Participant Postpartum Visits completed
